# Supplementary material
Source: PubMed Central journal article supplement (PMC4860137)
Supplement: NIHMS759374-supplement.pdf [file NIHMS759374-supplement.pdf]

**Supplementary Table 1**

**CUR + IBU**

| L3.6    | 24 hr  |      | 48 hr  |      |
|---------|--------|------|--------|------|
|         | Mean   | SEM  | Mean   | SEM  |
| Con     | 100.00 | 0.00 | 100.00 | 0.00 |
| Ibu     | 100.41 | 2.19 | 110.71 | 1.95 |
| Cur     | 83.89  | 2.96 | 76.26  | 2.02 |
| Ibu+Cur | 86.43  | 1.24 | 74.45  | 1.57 |

| MiaPaCa-2 | 24 hr  |      | 48 hr  |      |
|-----------|--------|------|--------|------|
|           | Mean   | SEM  | Mean   | SEM  |
| Con       | 100.00 | 0.00 | 100.00 | 0.00 |
| Ibu       | 102.10 | 1.99 | 99.67  | 1.35 |
| Cur       | 88.65  | 1.03 | 85.57  | 2.85 |
| Ibu+Cur   | 83.63  | 0.82 | 79.57  | 0.61 |

**Supplementary Table 2**

**CUR + TA**

| L3.6     | 24 hr  |      | 48 hr  |      | 72 hr  |      |
|----------|--------|------|--------|------|--------|------|
|          | Mean   | SEM  | Mean   | SEM  | Mean   | SEM  |
| Control  | 100.00 | 0.00 | 100.00 | 0.00 | 100.00 | 0.00 |
| TA       | 71.01  | 2.53 | 47.46  | 1.26 | 35.07  | 2.08 |
| CUR      | 85.63  | 2.40 | 76.21  | 3.36 | 67.26  | 3.52 |
| TA + Cur | 49.03  | 2.99 | 28.55  | 1.21 | 15.70  | 0.75 |

| MiaPaCa-2 | 24 hr  |      | 48 hr  |      | 72 hr  |      |
|-----------|--------|------|--------|------|--------|------|
|           | Mean   | SEM  | Mean   | SEM  | Mean   | SEM  |
| Control   | 100.00 | 0.00 | 100.00 | 0.00 | 100.00 | 0.00 |
| TA        | 88.60  | 3.34 | 68.26  | 3.70 | 56.42  | 1.53 |
| CUR       | 95.06  | 0.98 | 78.42  | 1.72 | 82.21  | 1.71 |
| TA + Cur  | 91.96  | 1.80 | 50.79  | 1.54 | 36.73  | 1.34 |

Pancreatic cancer cells were treated with vehicle (control) or Ibuprofen (Ibu) or Tolfenamic acid (TA) or Curcumin (Cur) or combination of Cur with Ibu or TA and the cell growth inhibition was measured at indicated time (24/48/72 h post-treatment) . Results are presented in % cell viability (Mean and SEM; n=3).

IC<sub>50</sub> Curves

## L3.6 TA

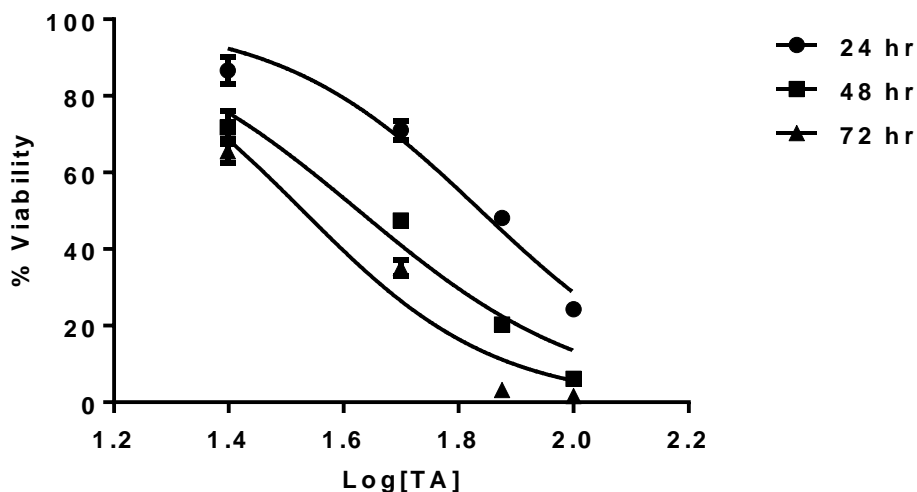

|                  | 24 hr | 48 hr | 72 hr |
|------------------|-------|-------|-------|
| IC <sub>50</sub> | 68.94 | 42.30 | 33.80 |

## MiaPaCa-2 TA

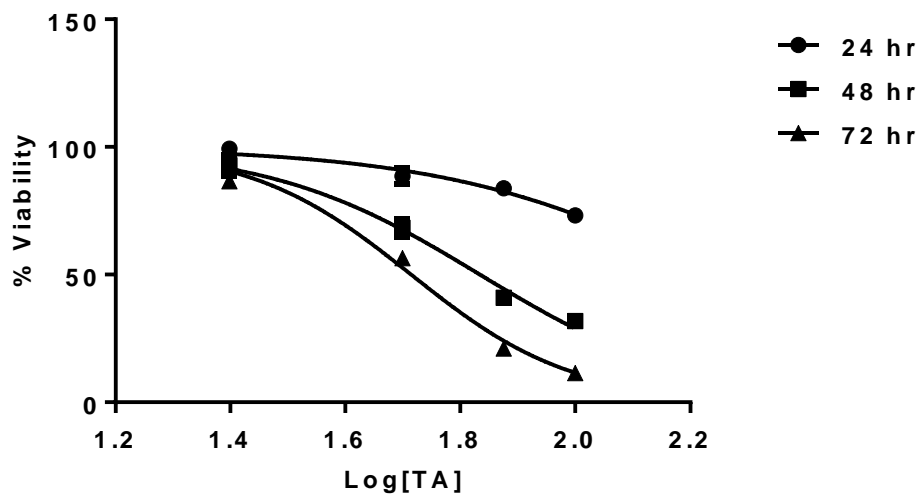

|                  | 24 hr | 48 hr | 72 hr |
|------------------|-------|-------|-------|
| IC <sub>50</sub> | 174.0 | 68.23 | 51.79 |

Pancreatic cancer cells were treated with increasing concentrations ( $\mu\text{M}$ ) of Tolfenamic acid (TA) and the cell growth inhibition was measured at 24, 48 and 72 h post-treatment. IC<sub>50</sub> values were calculated using GraphPad Prizm software.

## Supplementary Figure 2

### IC<sub>50</sub> Curves

#### L3.6 Cur

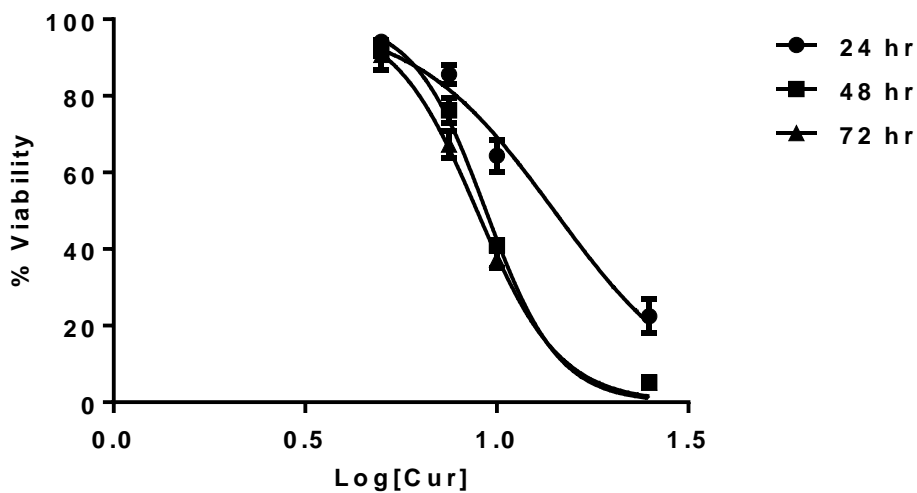

|                  | 24 hr | 48 hr | 72 hr |
|------------------|-------|-------|-------|
| IC <sub>50</sub> | 14.12 | 9.371 | 8.880 |

#### MiaPaCa-2 Cur

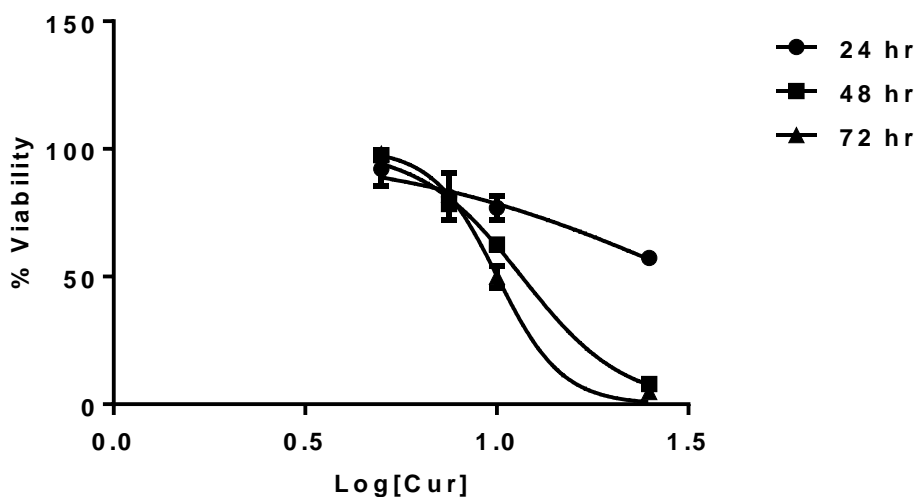

|                  | 24 hr | 48 hr | 72 hr |
|------------------|-------|-------|-------|
| IC <sub>50</sub> | 31.82 | 11.62 | 10.03 |

Pancreatic cancer cells were treated with increasing concentrations ( $\mu\text{M}$ ) of Curcumin (cur) and the cell growth inhibition was measured at 24, 48 and 72 h post-treatment. IC<sub>50</sub> values were calculated using GraphPad Prizm software.
